# Supplementary material for: MiR-431 attenuates synaptic plasticity and memory deficits in APPswe/PS1dE9 mice
Source: JCI journal article supplement (doi:10.1172/jci.insight.166270), 2023-05-16
Supplement: sd1 [file 1]

## Supplementary data

### MiR-431 attenuates synaptic plasticity and memory deficits in APP<sup>swe</sup>/PS1<sup>dE9</sup> mice

Jianwei Ge<sup>1,2,3,4#</sup>, Zhiwei Xue<sup>1,2,3,4#</sup>, Shu Shu<sup>1,2,3,4#</sup>, Linjie Yu<sup>1,2,3,4</sup>, Ruomeng Qin<sup>1,2,3,4</sup>, Wenyuan Tao<sup>1,2,3,4</sup>, Pinyi Liu<sup>1,2,3,4</sup>, Xiaohong Dong<sup>1</sup>, Zhen Lan<sup>5</sup>, Xinyu Bao<sup>1,2,3,4</sup>, Lei Ye<sup>1,2,3,4</sup>, Yun Xu<sup>1,2,3,4,5</sup>, Xiaolei Zhu<sup>1,2,3,4,5\*</sup>

<sup>1</sup>Department of Neurology, Drum Tower Hospital, Medical School and The State Key Laboratory of Pharmaceutical Biotechnology, Nanjing University, Nanjing, Jiangsu, 210008, PR China

<sup>2</sup>Institute of Brain Sciences, Institute of Brain Disorder Translational Medicine, Nanjing University, Nanjing, Jiangsu 210008, China

<sup>3</sup>Jiangsu Key Laboratory for Molecular Medicine, Medical School of Nanjing University, Nanjing, Jiangsu 210008, PR China

<sup>4</sup>Nanjing Neuropsychiatry Clinic Medical Center, Nanjing, Jiangsu 210008, PR China

<sup>5</sup>Department of Neurology, Drum Tower Hospital of Nanjing Medical University, Nanjing, Jiangsu 211166, PR China

# Jianwei Ge, Zhiwei Xue and Shu Shu contributed equally to this study.

\* Correspondence to: Xiaolei Zhu, M.D., Ph.D., Department of Neurology, Drum Tower Hospital, Medical School of Nanjing University, 321 Zhongshan Road, Nanjing, Jiangsu 210008, P.R. China. Tel.: +86 25 68182212; Fax: +86 25 83105208;

E-mail address: [zhuquelee@126.com](mailto:zhuquelee@126.com).

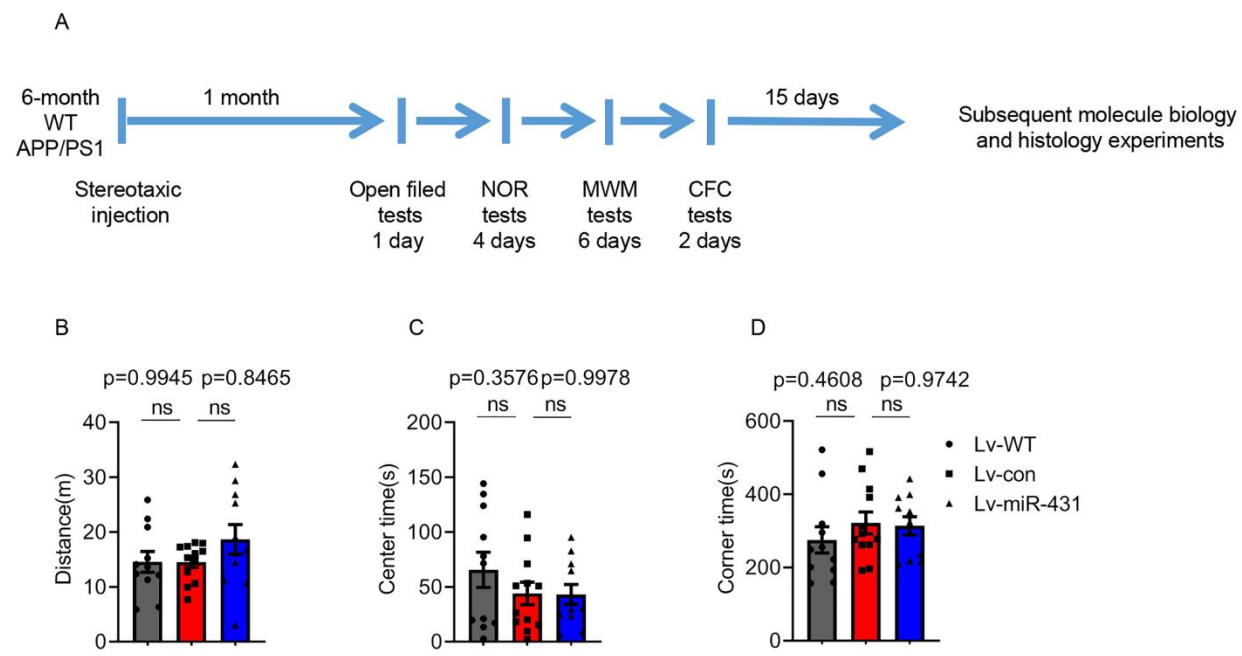

**Figure S1** MiR-431 overexpression doesn't modulate the motor function and emotional state of 6-month-old APP/PS1 mice. (A) The flow chart of the experiments. The total distance (B), time spent in the center (C) and corner area (D) were recorded of Lv-miR-431 treated APP/PS1 mice by Any-maze software in the OF test.  $n = 11-12$  for each group, ns: not significant. All data were presented as means  $\pm$  SEM. One-way ANOVA (B-D) was used.

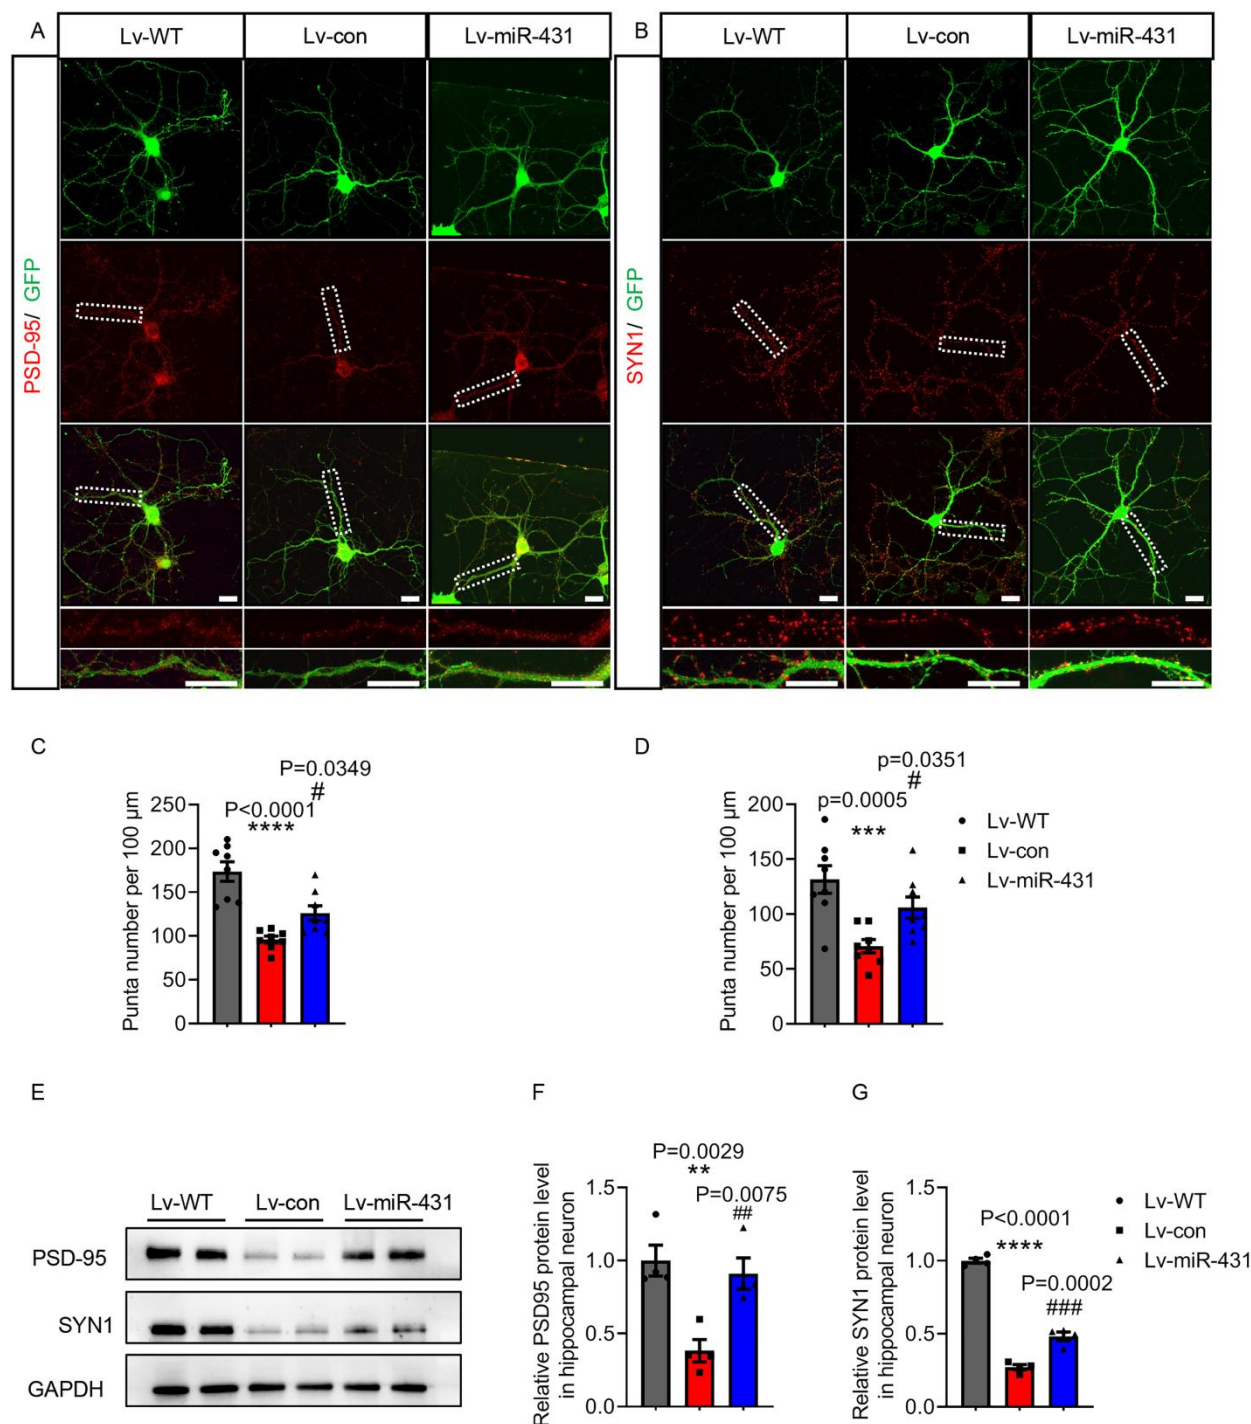

**Figure S2** MiR-431 overexpression improves the synaptic density, the PSD-95 and SYN1 protein levels in APP/PS1 hippocampal neurons. (A) Representative confocal images of PSD-95 (red) and GFP (green). Upper bar = 20μm, lower bar = 20μm. (B) Representative confocal images of SYN1 (red) and GFP (green). Upper bar = 20μm, lower bar = 20μm. (C) Quantification of PSD-95-positive puncta per 100μm of GFP-positive neurites. n = 8 neurons per group. (D) Quantification of SYN1-positive puncta per 100μm of GFP-positive neurites. n = 8 neurons per group. (E) Representative western blot of PSD-95 and SYN1 in WT or APP/PS1 hippocampal neurons. (F) Quantification of PSD-95 blots. n = 4. (G) Quantification of SYN1 blots. n = 4. \*\*p<0.01, \*\*\*p<0.001, \*\*\*\*p<0.0001 vs. Lv-WT group; # p< 0.05, ## p< 0.01, ### p<0.001 vs. Lv-con group. All data were presented as means ± SEM. One-way ANOVA (C, D, F and G) was used.

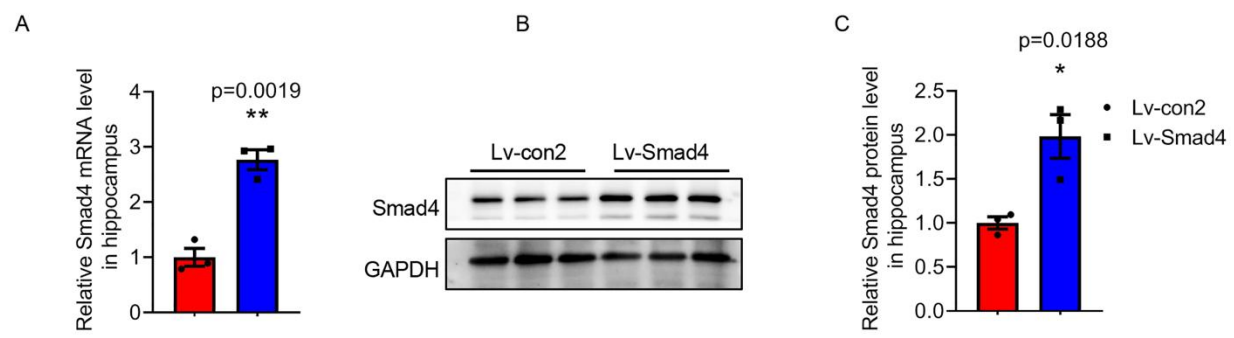

**Figure S3** Smad4 overexpression efficiency in Lv-Smad4 treated hippocampus of APP/PS1 mice. (A) The mRNA level of Smad4 in Lv-Smad4 treated hippocampus.  $n = 3$  (B, C). The protein level of Smad4 in Lv-Smad4 treated hippocampus.  $n = 3$ , \*  $p < 0.05$ , \*\*  $p < 0.01$  vs. Lv-con2. All data were presented as means  $\pm$  SE

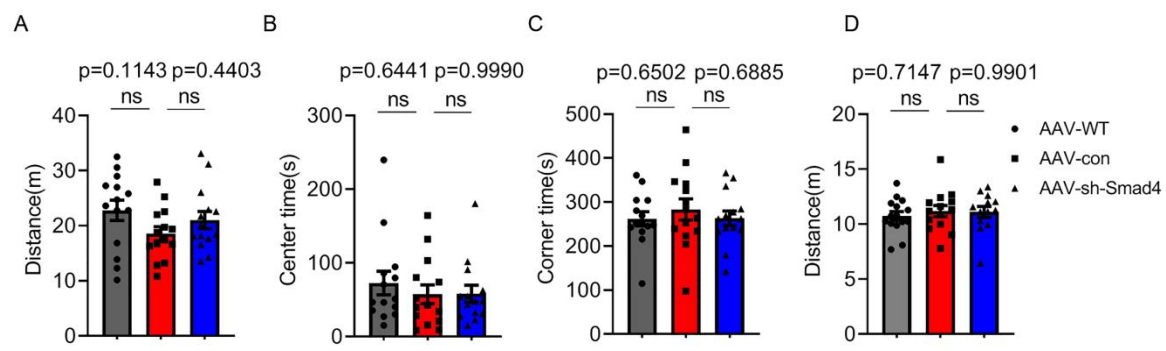

**Figure S4** Smad4 inhibition doesn't affect the motor function and emotional state of 6-month-old APP/PS1 mice. The total distance (A), time spent in the center (B) and corner area (C) were recorded of AAV-sh-Smad4 treated APP/PS1 mice by Any-maze software in the OF test. (D) Distance in MWM tests was detected in the acquisition trial, n = 14, ns: not significant. All data were presented as means  $\pm$  SEM. One-way ANOVA (A-D) was used.

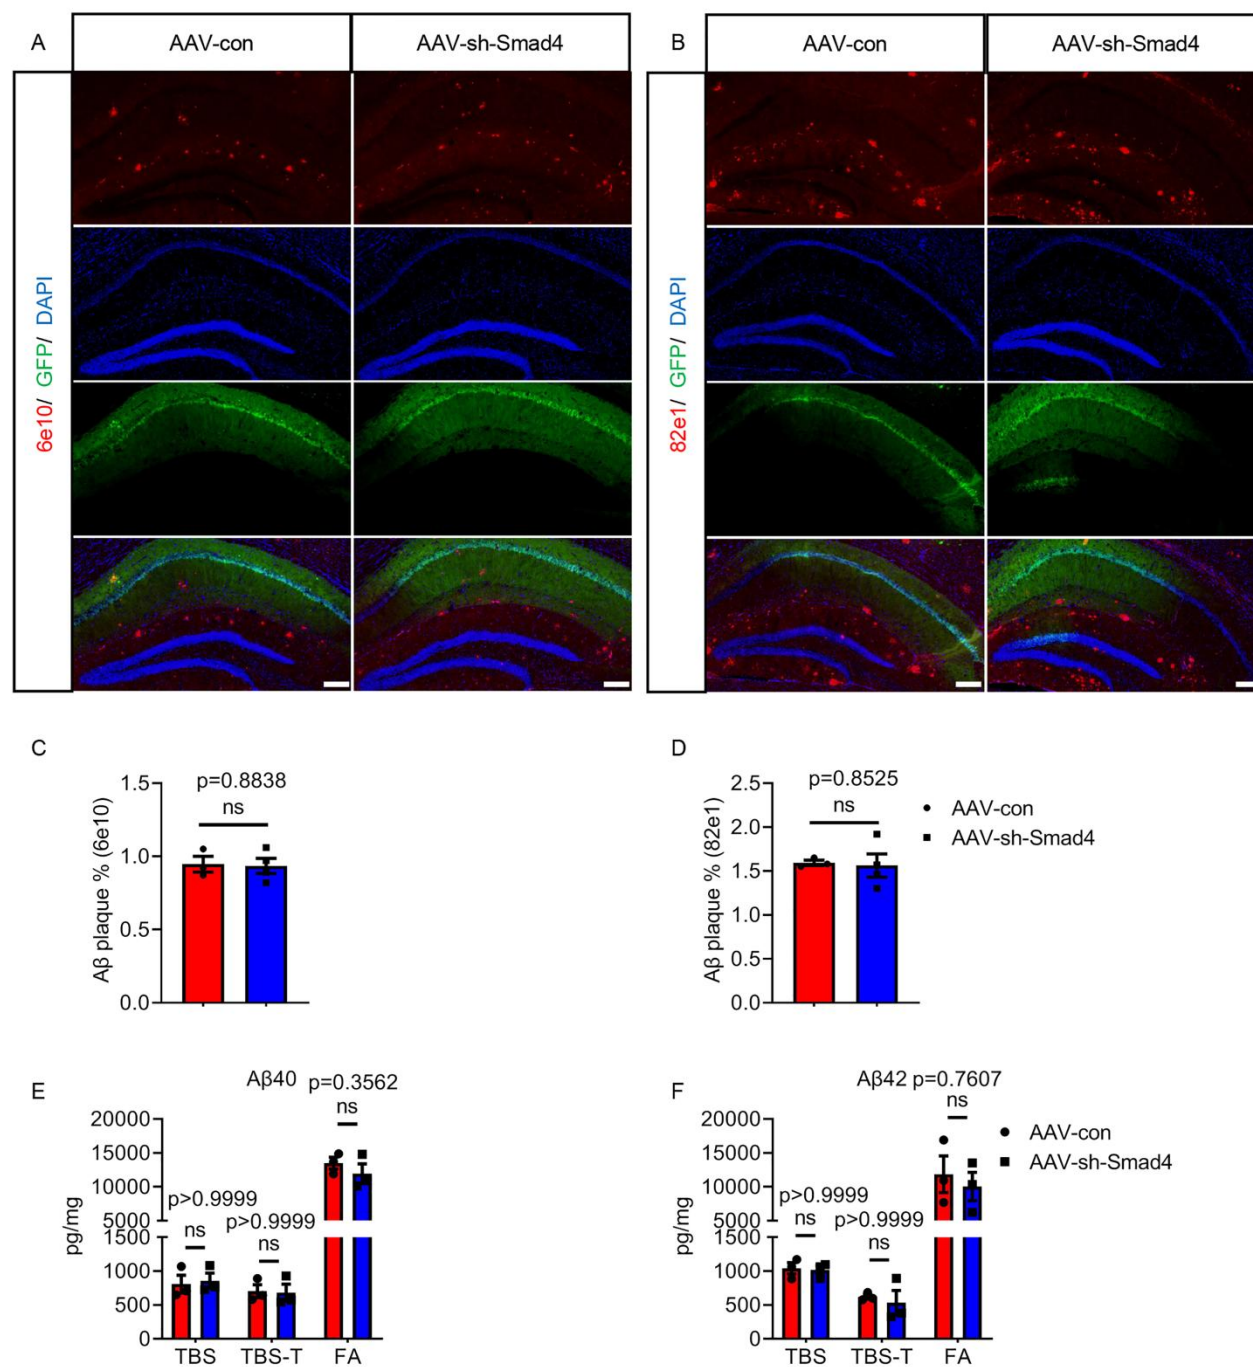

**Figure S5** Smad4 inhibition doesn't affect the Aβ levels in the hippocampus of 6-month-old APP/PS1 mice. (A) The level of Aβ 6e10 in the hippocampus of AAV-sh-Smad4 treated APP/PS1 mice were detected by immunofluorescence staining. (B) The level of Aβ 82e1 in the hippocampus of AAV-sh-Smad4 treated APP/PS1 mice were detected by immunofluorescence staining. (C) Quantitative analysis of the percentage of Aβ 6e10 positive area. n = 3-4 mice per group. Bar = 200μm. (D) Quantitative analysis of the percentage of Aβ 82e1 positive area. n=3-4 mice per group. Bar = 20 μm. The protein levels of TBS-soluble, TBS-T-soluble and FA-soluble Aβ<sub>40</sub> (E) and Aβ<sub>42</sub> (F) were measured by ELISA in the hippocampus of AAV-sh-Smad4 treated APP/PS1 mice. n=3, ns: not significant. All data were presented as means ± SEM. Two-tailed unpaired Student's t test (C, D) and two-way ANOVA (E, F) were used.

Supplement Table 1. Demographic and neuropsychological data.

| Items                    | HC<br>(n=23) | aMCI<br>(n=20) | AD<br>(n=25) | <i>p</i> | <i>p</i> (Mann-Whiney U Test) |                 |                   |
|--------------------------|--------------|----------------|--------------|----------|-------------------------------|-----------------|-------------------|
|                          |              |                |              |          | NC versus<br>aMCI             | NC versus<br>AD | aMCI versus<br>AD |
| <b>Demographics</b>      |              |                |              |          |                               |                 |                   |
| Age(y)                   | 63.33±1.5    | 68.65±2.4      | 66.28±1.5    | 0.1383   | 0.1200                        | 0.4434          | 0.6259            |
| Education(y)             | 11.78±0.9    | 10.88±1.0      | 6.520±0.85   | 0.0011*  | 0.4304                        | 0.0093*         | 0.0003*           |
| Gender<br>(male/female)  | 12/11        | 10/10          | 10/15        | 0.7747   | >0.9999                       | 0.5572          | 0.7715            |
| <b>General cognition</b> |              |                |              |          |                               |                 |                   |
| MMSE                     | 29.17±0.2    | 26.93±0.7      | 14.00±1.6    | <0.0001* | 0.0078*                       | <0.0001*        | <0.0001*          |
| MoCA                     | 24.39±0.7    | 20.00±1.1      | 8.83±1.5     | <0.0001* | 0.0019*                       | <0.0001*        | <0.0001*          |

Abbreviations: HC, Healthy control; aMCI, amnesic Mild cognitive impairment; AD, Alzheimer's disease; MMSE, Mini-Mental State Exam; MoCA, Montreal Cognitive Assessment.

Values were presented as the average ± standard error (SE).

*p*-value, the data do not satisfy the normal distribution in the one-way ANOVA, so the *p*-value is obtained by Kruskal-Wallis test. *p* (Mann-Whiney U Test) was used here due to the fact that the data were not normally distributed in the Post-hoc tests. \* indicates a statistical difference between groups,  $p < 0.05$ .
